# Supplementary material for: Endogenous retrovirus group FRD member 1 is a potential biomarker for prognosis and immunotherapy for kidney renal clear cell carcinoma
Source: Frontiers journal article supplement (doi:10.3389/fcimb.2023.1252905), 2023-09-13
Supplement: Image_1.PDF [file Image_1.PDF]

## Supplementary Figure S1

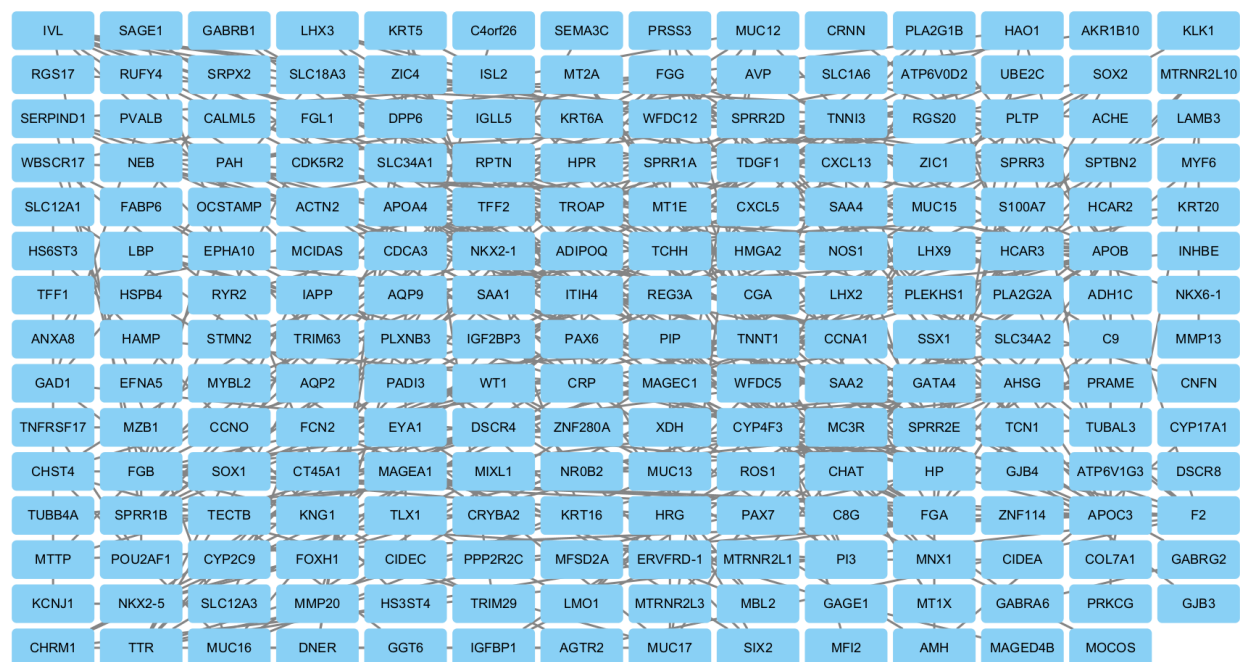

**Supplementary figure S1.** Protein–protein interaction network of ERVFRD-1-related DEGs.
