# Supplementary material for: Endogenous retrovirus group FRD member 1 is a potential biomarker for prognosis and immunotherapy for kidney renal clear cell carcinoma
Source: Frontiers journal article supplement (doi:10.3389/fcimb.2023.1252905), 2023-09-13
Supplement: Image_2.PDF [file Image_2.PDF]

# Supplementary Figure S2

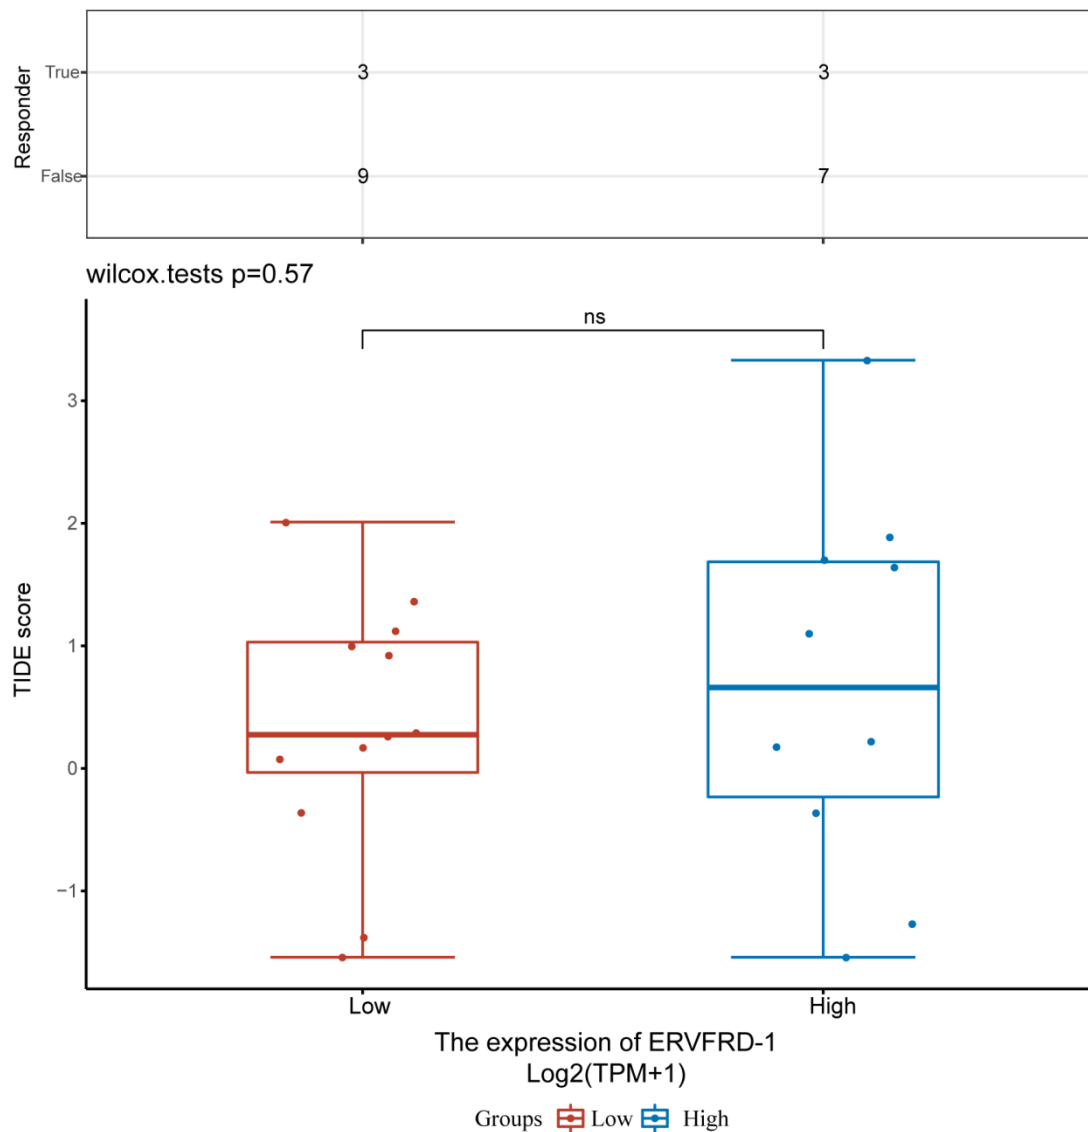

**Supplementary figure S2.** Response to PD-L1/PD-1 immunotherapy based on ERVFRD-1 expression levels. Up: Statistical table of immune response of samples in ERVFRD-1 low-high expression groups. Down: The distribution of immune response scores in ERVFRD-1 low-high expression groups.
