# Supplementary material for: Endogenous retrovirus group FRD member 1 is a potential biomarker for prognosis and immunotherapy for kidney renal clear cell carcinoma
Source: Frontiers journal article supplement (doi:10.3389/fcimb.2023.1252905), 2023-09-13
Supplement: Image_3.PDF [file Image_3.PDF]

### Supplementary Figure S3

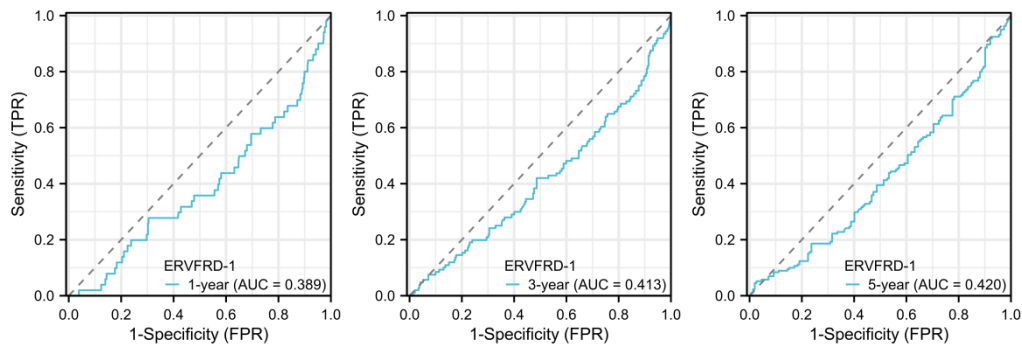

**Supplementary figure S3.** Time-dependent ROC curves at different time points.

Time-dependent ROC curves based on ERVFRD-1 expression for one-, three-, and five-year OS probability. ROC, receiver-operating characteristic; AUC, area under the ROC curve; OS, overall survival.
